# Supplementary material for: Dual donor–π–acceptor type organic dyes for efficient dye-sensitized solar cells
Source: Royal Society of Chemistry journal article supplement (doi:10.1039/c6nj02720b), 2016-01-01
Supplement: c6nj02720b2.pdf [file c6nj02720b2.pdf]

## Dual Donor- $\pi$ -Acceptor Type Organic Dyes for Efficient Dye-Sensitized Solar Cells

Pei-Yu Chang<sup>1</sup>, Po-Hsin Wang<sup>1</sup>, Wen-Churng Lin<sup>2</sup>, Chien-Hsin Yang<sup>1,\*</sup>

New Journal of Chemistry

2016/10/1

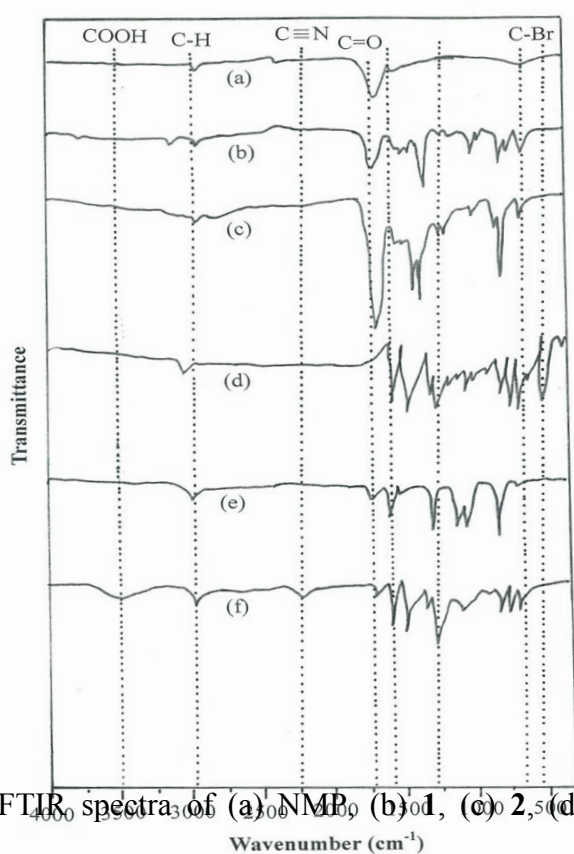

Figure 2S. FTIR spectra of (a) NMP, (b) **1**, (c) **2**, (d) **3**, (e) **4**, and (f) MTPA-2 compounds in Scheme 2.
